# Supplementary material
Source: PubMed Central journal article supplement (PMC1618607)
Supplement: amjpathol_165_3_707__1.pdf [file amjpathol_165_3_707__1.pdf]

**Supplemental Table 1** Differential Gene Expression in Oral Warts Compared to Normal Mucosa

| Gene                                    | Median Ct Mucosa <sup>1</sup> | Confidence Interval Mucosa | Median Ct Oral Warts <sup>1</sup> | Confidence Interval Oral Warts | Delta Median Ct <sup>2</sup> |
|-----------------------------------------|-------------------------------|----------------------------|-----------------------------------|--------------------------------|------------------------------|
| <i>Chemokine Receptors</i>              |                               |                            |                                   |                                |                              |
| CCR1                                    | 30.16                         | 27.0 – 33.7                | 34.07                             | 29.9 – 38.8                    | -3.91                        |
| CCR2                                    | 27.81                         | 24.9 – 31.1                | 30.86                             | 27.1 – 35.1                    | -3.05                        |
| <b>CCR3</b>                             | 39.66                         | 35.5 – 40.0                | 32.34                             | 28.4 – 36.8                    | <b>7.32</b>                  |
| CCR5                                    | 25.63                         | 22.9 – 28.7                | 28.77                             | 25.3 – 32.7                    | -3.14                        |
| CCR6                                    | 26.33                         | 23.6 – 29.4                | 31.11                             | 27.3 – 35.4                    | -4.78                        |
| CCR7                                    | 24.74                         | 22.1 – 27.7                | 26.18                             | 23.0 – 29.8                    | -1.45                        |
| CCR8                                    | 37.40                         | 33.4 – 40.0                | 34.55                             | 30.4 – 39.3                    | 2.85                         |
| <b>CCRL2</b>                            | 36.34                         | 32.5 – 40.0                | 25.27                             | 22.2 – 28.7                    | <b>11.08</b>                 |
| CXCR3                                   | 27.59                         | 24.7 – 30.8                | 27.94                             | 24.6 – 31.8                    | -0.36                        |
| CXCR4                                   | 21.95                         | 19.6 – 24.5                | 21.75                             | 19.1 – 24.7                    | 0.20                         |
| CXCR5                                   | 32.76                         | 29.3 – 36.6                | 30.96                             | 27.2 – 35.2                    | 1.80                         |
| <b>IL8R<math>\alpha</math></b>          | 32.38                         | 29.0 – 36.2                | 23.81                             | 20.9 – 27.1                    | <b>8.57</b>                  |
| IL8R $\beta$                            | 18.03                         | 16.1 – 20.2                | 19.25                             | 16.9 – 21.9                    | -1.22                        |
| <i>Chemokines</i>                       |                               |                            |                                   |                                |                              |
| CCL1                                    | 38.65                         | 34.6 – 40.0                | 38.14                             | 33.1 – 40.0                    | 0.52                         |
| CCL16                                   | 40.00                         | 35.8 – 40.0                | 40.00                             | 35.1 – 40.0                    | 0.00                         |
| CCL17                                   | 25.77                         | 23.0 – 28.8                | 28.04                             | 24.3 – 32.3                    | -2.26                        |
| CCL18                                   | 39.81                         | 35.6 – 40.0                | 36.87                             | 32.0 – 40.0                    | 2.94                         |
| CCL23                                   | 40.00                         | 35.8 – 40.0                | 37.66                             | 33.1 – 40.0                    | 2.34                         |
| CXCL13                                  | 39.13                         | 35.0 – 40.0                | 40.00                             | 35.7 – 40.0                    | -0.87                        |
| Eotaxin                                 | 37.77                         | 33.8 – 40.0                | 37.35                             | 32.8 – 40.0                    | 0.42                         |
| IL8                                     | 36.04                         | 32.2 – 40.0                | 31.09                             | 27.3 – 35.4                    | 4.95                         |
| IP10                                    | 40.00                         | 35.8 – 40.0                | 37.04                             | 32.6 – 40.0                    | 2.96                         |
| MCP1                                    | 28.27                         | 25.3 – 31.6                | 32.48                             | 28.5 – 36.9                    | -4.21                        |
| MCP4                                    | 40.00                         | 35.8 – 40.0                | 34.66                             | 30.5 – 39.4                    | 5.34                         |
| MIF                                     | 16.74                         | 15.0 – 18.7                | 14.89                             | 13.1 – 16.9                    | 1.85                         |
| <b>MIG</b>                              | 37.42                         | 33.5 – 40.0                | 30.66                             | 26.9 – 34.9                    | <b>6.76</b>                  |
| <b>MIP1<math>\alpha</math></b>          | 38.23                         | 34.2 – 40.0                | 31.58                             | 27.8 – 35.9                    | <b>6.65</b>                  |
| MIP1 $\beta$                            | 33.00                         | 29.5 – 36.9                | 34.47                             | 30.3 – 39.2                    | -1.47                        |
| MIP3 $\alpha$                           | 29.65                         | 26.5 – 33.1                | 28.62                             | 25.2 – 32.6                    | 1.03                         |
| MIP3 $\beta$                            | 38.21                         | 34.2 – 40.0                | 34.51                             | 30.3 – 39.3                    | 3.70                         |
| <b>RANTES</b>                           | 20.69                         | 18.5 – 23.1                | 25.96                             | 22.8 – 29.5                    | <b>-5.27</b>                 |
| S100A8                                  | 20.00                         | 17.9 – 22.4                | 18.03                             | 15.8 – 20.5                    | 1.97                         |
| <b>S100A9</b>                           | 11.44                         | 10.2 – 12.8                | 9.01                              | 7.9 – 10.2                     | <b>2.44</b>                  |
| SDF                                     | 33.34                         | 29.8 – 37.3                | 37.45                             | 32.9 – 40.0                    | -4.11                        |
| SLC                                     | 35.59                         | 31.8 – 39.8                | 37.28                             | 32.8 – 40.0                    | -1.69                        |
| <i>Cytokine/Growth Factor Receptors</i> |                               |                            |                                   |                                |                              |
| CSF1R                                   | 23.16                         | 20.7 – 25.9                | 24.90                             | 21.9 – 28.3                    | -1.75                        |
| <b>EDG1</b>                             | 25.70                         | 23.0 – 28.7                | 30.35                             | 26.7 – 34.5                    | <b>-4.65</b>                 |
| EDG2                                    | 21.96                         | 19.6 – 24.6                | 25.52                             | 22.4 – 29.0                    | -3.56                        |
| EDG4                                    | 21.46                         | 19.2 – 24.0                | 20.20                             | 17.8 – 23.0                    | 1.26                         |
| EGFR                                    | 19.16                         | 17.1 – 21.4                | 17.39                             | 15.3 – 19.8                    | 1.77                         |
| FGFR4                                   | 33.97                         | 30.4 – 38.0                | 37.67                             | 33.1 – 40.0                    | -3.70                        |
| IFNR                                    | 31.77                         | 28.4 – 35.5                | 29.27                             | 25.7 – 33.3                    | 2.50                         |
| <b>IFN<math>\gamma</math>R1</b>         | 20.46                         | 18.3 – 22.9                | 17.30                             | 15.2 – 19.7                    | <b>3.16</b>                  |
| IFN $\gamma$ R2                         | 22.37                         | 20.0 – 25.0                | 21.11                             | 18.6 – 24.0                    | 1.26                         |

|                                 |       |             |       |             |              |
|---------------------------------|-------|-------------|-------|-------------|--------------|
| IL1R type II                    | 26.36 | 23.6 – 29.5 | 25.52 | 22.4 – 29.0 | 0.84         |
| IL2R $\alpha$                   | 31.50 | 28.2 – 35.2 | 32.04 | 28.2 – 36.5 | -0.54        |
| IL2R $\beta$                    | 30.06 | 26.9 – 33.6 | 33.07 | 29.1 – 37.6 | -3.01        |
| IL2R $\gamma$                   | 23.25 | 20.8 – 26.0 | 25.97 | 22.8 – 29.6 | -2.72        |
| IL3R $\alpha$                   | 35.36 | 31.6 – 39.5 | 33.82 | 29.7 – 38.5 | 1.54         |
| <b>IL4R<math>\alpha</math></b>  | 28.91 | 25.9 – 32.3 | 24.31 | 21.4 – 27.7 | <b>4.60</b>  |
| IL5R $\alpha$                   | 40.00 | 35.8 – 40.0 | 40.00 | 36.2 – 40.0 | 0.00         |
| IL6R $\alpha$                   | 26.29 | 23.5 – 29.4 | 22.60 | 19.9 – 25.7 | 3.69         |
| IL7R                            | 23.77 | 21.3 – 26.6 | 26.20 | 23.0 – 29.8 | -2.43        |
| IL9R $\alpha$                   | 35.67 | 31.9 – 39.9 | 37.73 | 33.2 – 40.0 | -2.06        |
| <b>IL10R<math>\alpha</math></b> | 29.51 | 26.4 – 33.0 | 24.51 | 21.5 – 27.9 | <b>5.00</b>  |
| IL11R $\alpha$                  | 33.59 | 30.0 – 37.6 | 31.99 | 28.1 – 36.4 | 1.60         |
| IL12R                           | 36.69 | 32.8 – 40.0 | 39.20 | 34.5 – 40.0 | -2.50        |
| IL13R $\alpha$ 1                | 18.98 | 17.0 – 21.2 | 17.31 | 15.2 – 19.7 | 1.67         |
| IL13R $\alpha$ 2                | 40.00 | 35.8 – 40.0 | 36.99 | 32.5 – 40.0 | 3.01         |
| IL15R $\alpha$                  | 26.05 | 23.3 – 29.1 | 25.44 | 22.4 – 28.9 | 0.61         |
| IL17R                           | 27.97 | 25.0 – 31.3 | 25.54 | 22.5 – 29.1 | 2.43         |
| IL18R                           | 34.00 | 30.4 – 38.0 | 34.00 | 29.9 – 38.7 | 0.01         |
| MDFA                            | 38.61 | 34.5 – 40.0 | 36.33 | 31.5 – 40.0 | 2.28         |
| MGFA                            | 22.63 | 20.2 – 25.3 | 20.14 | 17.5 – 23.2 | 2.49         |
| MGFB                            | 22.53 | 20.1 – 25.2 | 20.05 | 17.4 – 23.1 | 2.48         |
| TGF $\beta$ R1                  | 20.67 | 18.5 – 23.1 | 18.75 | 23.3 – 30.2 | 1.92         |
| TGF $\beta$ R2                  | 26.44 | 23.6 – 29.6 | 25.03 | 26.0 – 33.6 | 1.41         |
| TGF $\beta$ R3                  | 21.66 | 19.4 – 24.2 | 23.92 | 22.0 – 28.5 | -2.26        |
| TNFR                            | 17.90 | 16.0 – 20.0 | 15.87 | 13.9 – 18.1 | 2.03         |
| <b>Cytokines/Growth Factors</b> |       |             |       |             |              |
| CSF1                            | 23.49 | 21.0 – 26.3 | 20.65 | 18.2 – 23.5 | 2.84         |
| <b>EGF</b>                      | 38.48 | 34.4 – 40.0 | 28.57 | 25.1 – 32.5 | <b>9.91</b>  |
| <b>EGR1</b>                     | 23.84 | 21.3 – 26.7 | 17.98 | 15.8 – 20.5 | <b>5.86</b>  |
| ENA78                           | 40.00 | 35.8 – 40.0 | 40.00 |             | 0.00         |
| Endothelin 1                    | 26.86 | 24.0 – 30.0 | 25.09 | 22.1 – 28.5 | 1.77         |
| Endothelin 3                    | 33.86 | 30.3 – 37.9 | 34.86 | 30.6 – 39.7 | -0.99        |
| <b>FGF1</b>                     | 32.40 | 29.0 – 36.2 | 24.57 | 21.6 – 28.0 | <b>7.82</b>  |
| FGF6                            | 40.00 | 35.8 – 40.0 | 40.00 | 35.1 – 40.0 | 0.00         |
| G-CSF                           | 34.63 | 31.0 – 38.7 | 35.16 | 30.9 – 40.0 | -0.53        |
| <b>GMCSF</b>                    | 40.00 | 35.8 – 40.0 | 28.87 | 25.4 – 32.8 | <b>11.13</b> |
| <b>HBEGF</b>                    | 19.52 | 17.5 – 21.8 | 16.52 | 14.5 – 18.8 | <b>3.00</b>  |
| IFN $\gamma$                    | 34.44 | 30.8 – 38.5 | 34.14 | 30.0 – 38.8 | 0.30         |
| IK                              | 19.04 | 17.0 – 21.3 | 17.47 | 15.4 – 19.9 | 1.56         |
| <b>IL1<math>\alpha</math></b>   | 24.42 | 21.8 – 27.3 | 18.35 | 16.1 – 20.9 | <b>6.07</b>  |
| IL1 $\beta$                     | 26.90 | 24.1 – 30.1 | 22.98 | 20.2 – 26.1 | 3.92         |
| IL2                             | 40.00 | 35.8 – 40.0 | 39.98 | 35.1 – 40.0 | 0.02         |
| IL4                             | 39.78 | 35.6 – 40.0 | 40.00 | 35.3 – 40.0 | -0.22        |
| IL5                             | 38.53 | 34.5 – 40.0 | 40.00 | 35.3 – 40.0 | -1.47        |
| IL6                             | 40.00 | 35.8 – 40.0 | 40.00 | 35.3 – 40.0 | 0.00         |
| IL9 $\beta$                     | 36.06 | 32.2 – 40.0 | 32.22 | 28.0 – 37.1 | 3.83         |
| IL10                            | 37.27 | 33.3 – 40.0 | 34.96 | 30.7 – 39.8 | 2.31         |
| IL11                            | 35.07 | 31.4 – 39.2 | 33.82 | 29.7 – 38.5 | 1.25         |
| IL12 $\alpha$                   | 26.35 | 23.6 – 29.5 | 30.67 | 27.0 – 34.9 | -4.32        |
| IL12 $\beta$                    | 40.00 | 35.8 – 40.0 | 38.18 | 33.6 – 40.0 | 1.82         |
| IL13                            | 40.00 | 35.8 – 40.0 | 36.98 | 32.5 – 40.0 | 3.02         |
| IL14                            | 23.47 | 21.0 – 26.2 | 22.15 | 19.5 – 25.2 | 1.33         |

|                                      |       |              |       |             |              |
|--------------------------------------|-------|--------------|-------|-------------|--------------|
| IL15                                 | 35.22 | 31.5 – 39.4  | 37.25 | 32.7 – 40.0 | -2.03        |
| <b>IL16</b>                          | 28.17 | 25.2 – 31.5  | 23.58 | 20.7 – 26.8 | <b>4.59</b>  |
| IL17                                 | 38.34 | 34.3 – 40.0  | 36.67 | 32.2 – 40.0 | 1.67         |
| IL18                                 | 22.32 | 20.0 – 25.0  | 24.30 | 21.4 – 27.6 | -1.98        |
| IL19                                 | 36.42 | 32.6 – 40.0  | 31.32 | 27.5 – 35.6 | 5.10         |
| IL21                                 | 40.00 | 35.9 – 40.0  | 40.00 | 35.3 – 40.0 | 0.00         |
| IL22                                 | 40.00 | 35.8 – 40.0  | 36.56 | 31.7 – 40.0 | 3.44         |
| SCF                                  | 39.45 | 35.3 – 40.0  | 36.95 | 32.1 – 40.0 | 2.50         |
| LEF1                                 | 29.33 | 26.2 – 32.8  | 26.25 | 23.1 – 29.9 | 3.08         |
| LIF                                  | 35.43 | 31.7 – 39.6  | 34.09 | 30.0 – 38.8 | 1.34         |
| Lymphotoxin $\beta$                  | 28.12 | 25.1 – 31.4  | 29.08 | 25.6 – 33.1 | -0.96        |
| Osteopontin                          | 40.00 | 35.8 – 40.0  | 40.00 | 35.3 – 40.0 | 0.00         |
| TGF $\beta$ 1                        | 30.54 | 27.3 – 34.1  | 26.54 | 23.3 – 30.2 | 4.00         |
| TGF $\beta$ 2                        | 32.78 | 29.3 – 36.7  | 29.54 | 26.0 – 33.6 | 3.24         |
| TGF $\beta$ 3                        | 29.29 | 26.2 – 32.7  | 27.11 | 23.8 – 30.8 | 2.18         |
| TNF $\alpha$                         | 25.22 | 22.6 – 28.2  | 22.24 | 19.5 – 25.3 | 2.98         |
| <b>TNF<math>\beta</math></b>         | 32.40 | 29.0 – 36.2  | 38.28 | 33.7 – 40.0 | <b>-5.88</b> |
| VEGF                                 | 17.90 | 16.0 – 20.0  | 15.23 | 13.4 – 17.3 | 2.67         |
| <b><i>Effector Molecules</i></b>     |       |              |       |             |              |
| Anexin                               | 12.25 | 11.0 – 13.7  | 10.58 | 9.3 – 12.0  | 1.67         |
| Defensin $\alpha$ 1                  | 27.58 | 24.7 – 30.8  | 31.30 | 27.5 – 35.6 | -3.71        |
| Defensin $\alpha$ 3                  | 27.57 | 24.7 – 30.8  | 29.93 | 26.0 – 34.5 | -2.36        |
| Defensin $\alpha$ 4                  | 32.47 | 29.0 – 36.3  | 27.70 | 24.0 – 31.9 | 4.78         |
| Defensin $\alpha$ 5                  | 40.00 | 35.8 – 40.0  | 39.20 | 34.0 – 40.0 | 0.80         |
| <b>Defensin <math>\alpha</math>6</b> | 40.14 | 35.9 – 40.0  | 31.32 | 27.2 – 36.1 | <b>8.82</b>  |
| Defensin $\beta$ 1                   | 21.60 | 19.3 – 24.2  | 18.84 | 16.6 – 21.4 | 2.76         |
| <b>Defensin <math>\beta</math>2</b>  | 22.25 | 19.9 – 24.9  | 14.67 | 12.7 – 16.9 | <b>7.58</b>  |
| <b>Gelatinase B</b>                  | 32.09 | 28.7 – 35.9  | 25.21 | 22.2 – 28.7 | <b>6.88</b>  |
| GRANULYSIN                           | 29.66 | 26.5 – 33.2  | 31.33 | 27.5 – 35.6 | -1.67        |
| GRANZYME A                           | 27.39 | 24.5 – 30.6  | 30.98 | 26.9 – 35.7 | -3.59        |
| GRANZYME B                           | 27.07 | 24.2 – 30.3  | 30.26 | 26.6 – 34.4 | -3.18        |
| IL1R Antagonist                      | 17.74 | 15.9 – 19.8  | 17.94 | 15.8 – 20.4 | -0.20        |
| Interferon regulatory factor 1       | 23.46 | 21.0 – 26.2  | 23.81 | 20.9 – 27.1 | -0.35        |
| Myeloperoxidase                      | 40.00 | 35.8 – 40.0  | 40.00 | 35.3 – 40.0 | 0.00         |
| NOS2A                                | 40.00 | 35.8 – 40.0  | 34.54 | 30.0 – 39.8 | 5.46         |
| Perforin                             | 29.24 | 26.1 – 32.7  | 32.60 | 28.7 – 37.1 | -3.36        |
| PMN elastase                         | 40.00 | 35.8 – 40.0  | 32.85 | 28.9 – 37.4 | <b>7.15</b>  |
| SLP 1                                | 11.88 | 10.6 – 13.3  | 10.07 | 8.8 – 11.5  | 1.81         |
| TRAIL                                | 20.14 | 18.0 – 22.5  | 18.96 | 16.7 – 21.6 | 1.18         |
| <b><i>Surface Markers</i></b>        |       |              |       |             |              |
| CD1 $\alpha$                         | 28.20 | 25.2 – 31.5  | 26.53 | 23.3 – 30.2 | 1.67         |
| <b>CD3<math>\gamma</math></b>        | 23.59 | 21.1 – 26.4  | 32.33 | 28.4 – 36.8 | <b>-8.75</b> |
| CD4                                  | 27.01 | 24.2 – 30.2  | 26.20 | 23.0 – 29.8 | 0.80         |
| CD8                                  | 28.99 | 25.9 – 32.4  | 31.93 | 28.1 – 36.3 | -2.94        |
| CD14                                 | 24.39 | 21.8 – 27.3  | 26.44 | 23.2 – 30.1 | -2.06        |
| CD16                                 | 37.31 | 33.4 – 40.0  | 31.87 | 28.0 – 36.3 | 5.45         |
| CD19                                 | 40.00 | 35.8 – 40.0  | 35.72 | 31.4 – 40.0 | 4.28         |
| CD23                                 | 40.00 | 35.8 – 40.0  | 40.00 | 35.3 – 40.0 | 0.00         |
| CD27L                                | 35.43 | 31.7 – 39.6  | 30.47 | 26.8 – 34.7 | 4.96         |
| CD34                                 | 31.20 | 276.9 – 34.9 | 31.76 | 27.6 – 36.6 | -0.56        |
| CD40L                                | 36.14 | 32.3 – 40.0  | 31.79 | 27.9 – 36.2 | 4.35         |
| CD44                                 | 18.98 | 17.0 – 21.2  | 17.52 | 15.4 – 19.9 | 1.46         |

|                                |       |             |       |             |              |
|--------------------------------|-------|-------------|-------|-------------|--------------|
| CD56                           | 38.15 | 34.1 – 40.0 | 37.75 | 33.2 – 40.0 | 0.39         |
| CD62 E                         | 40.00 | 35.8 – 40.0 | 37.82 | 33.2 – 40.0 | 2.18         |
| CD62 L                         | 37.09 | 33.2 – 40.0 | 34.52 | 30.3 – 39.3 | 2.57         |
| <b>CD62 P</b>                  | 40.00 | 35.8 – 40.0 | 31.95 | 28.1 – 36.4 | <b>8.05</b>  |
| CD69                           | 35.13 | 31.4 – 39.3 | 33.08 | 29.1 – 37.6 | 2.05         |
| <b>CD79<math>\alpha</math></b> | 36.03 | 32.2 – 40.0 | 24.47 | 20.9 – 28.7 | <b>11.55</b> |
| CD80                           | 34.14 | 30.5 – 38.2 | 31.78 | 27.9 – 36.2 | 2.36         |
| CD86                           | 27.88 | 24.9 – 31.2 | 24.88 | 21.9 – 28.3 | 2.99         |
| FC $\epsilon$ RI               | 17.71 | 15.8 – 19.8 | 17.89 | 15.7 – 20.4 | -0.18        |
| Hevin                          | 29.16 | 26.1 – 32.6 | 25.85 | 22.7 – 29.4 | 3.30         |
| ICAM1                          | 28.67 | 25.6 – 32.1 | 28.56 | 25.1 – 32.5 | 0.10         |
| ICAM2                          | 30.77 | 27.5 – 34.4 | 35.58 | 31.3 – 40.0 | -4.81        |
| ICAM3                          | 24.77 | 22.1 – 27.7 | 27.42 | 24.1 – 32.2 | -2.65        |
| KIT                            | 37.26 | 33.3 – 40.0 | 38.55 | 33.5 – 40.0 | -1.29        |
| PECAM1                         | 26.82 | 24.0 – 30.0 | 30.07 | 26.4 – 34.2 | -3.25        |
| TCR $\alpha$                   | 30.87 | 27.6 – 34.5 | 33.23 | 29.2 – 37.8 | -2.36        |
| <b>TCR<math>\beta</math></b>   | 20.60 | 18.4 – 23.0 | 25.51 | 22.4 – 29.0 | <b>-4.91</b> |
| TCR $\delta$                   | 35.88 | 32.1 – 40.0 | 37.45 | 32.9 – 40.0 | -1.57        |
| THY1                           | 33.87 | 30.3 – 37.9 | 33.54 | 29.5 – 38.2 | 0.33         |
| VCAM1                          | 34.79 | 31.1 – 38.9 | 37.14 | 32.6 – 40.0 | -2.35        |
| VLA4                           | 26.40 | 23.6 – 29.5 | 25.82 | 22.7 – 29.4 | 0.58         |

<sup>2</sup>Median Ct values are derived by “back-transformation” of mean logCt values <sup>1</sup>

<sup>3</sup>Median Ct values from normal mucosa were subtracted from Median Ct values of oral warts. Positive values indicate increased expression and negative values reduced expression in oral warts compared to control mucosa. Significant differences ( $p < 0.05$ ) indicated in bold.

## Reference

1. Bland, J.M. & Altman, D.G. Transformation, means, and confidence intervals. *British Medical Journal* **312**, 1079 (1996).
